# Supplementary material for: Conventional Pathology Versus Gene Signatures for Assessing Luminal A and B Type Breast Cancers: Results of a Prospective Cohort Study
Source: MDPI journal article supplement (doi:10.3390/genes9050261), 2018-05-17
Supplement: s1 [file s1]

**Supplementary table 1** Comparison of Luminal A and Luminal B type tumors with Ki67 versus gene-signatures (70-GS/80-GS) (n=179)

| <b>Molecular subtypes</b>                               |                      |                      |              |
|---------------------------------------------------------|----------------------|----------------------|--------------|
| <b>Clinical subtypes</b>                                | <b>Luminal A (%)</b> | <b>Luminal B (%)</b> | <b>Total</b> |
| <b>ER+, PR ≥20%,<br/>HER2-, Ki67 &lt;14%</b>            | 86(64)               | 49(36)               | 135          |
| <b>ER+ &amp; (PR&lt;20%, or<br/>HER2+ or Ki67 ≥14%)</b> | 17(39)               | 27(61)               | 44           |
| <b>Total</b>                                            | 103                  | 76                   | 179          |

70-GS 70-gene signature, Ki-67 proliferation marker protein. The overall concordance between ki67 and the 70-GS was 65%. Kappa 0.20 95% CI 0.048 – 0.35. Using a 14% Ki67 cut off value, 6 patients could not be stratified into Ki67 'low' or 'high' based on their Ki67 percentage and were excluded from the current analysis.
